# Supplementary material for: Mesoporous SBA-15 supported gold nanoparticles for solvent-free oxidation of cyclohexane: superior catalytic activity with higher cyclohexanone selectivity
Source: Royal Society of Chemistry journal article supplement (doi:10.1039/d2cp04198g), 2022-01-01
Supplement: d2cp04198g1.pdf [file d2cp04198g1.pdf]

## Electronic Supplementary Information

### **Mesoporous SBA-15 supported gold nanoparticles for solvent-free oxidation of cyclohexane: Superior catalytic activity with higher cyclohexanone selectivity**

Diganta Bhuyan<sup>a,c</sup>, Sanmilan Jyoti Kalita <sup>a</sup> and Lakshi Saikia<sup>\*a,b</sup>

<sup>a</sup>Materials Sciences and Technology Division, CSIR-North East Institute of Science and  
Technology

Jorhat– 785006, Assam, India

<sup>b</sup>Academy of Scientific and Innovative Research, CSIR-HRDC, Ghazaiabad, UP, India

<sup>c</sup>Present Address-Department of Chemistry, Bornagar College, Barpeta, Assam

\*Corresponding author. Tel.: +91 376 2370 081; Fax. +91 376 2370 011

\*E-mail address: [l.saikia@gmail.com](mailto:l.saikia@gmail.com)

---

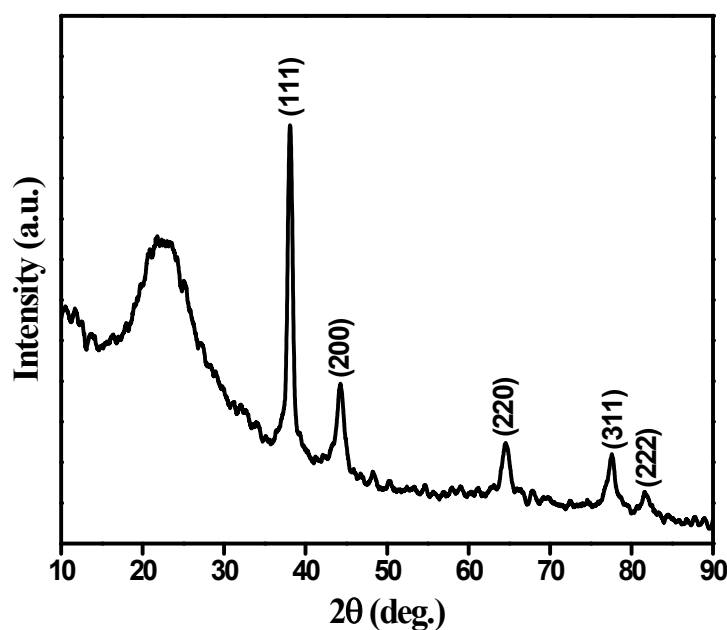

**Fig. S1** Wide angle XRD pattern of the SBA-15/Au<sup>0</sup> nanohybrid catalyst recovered after fifth run.

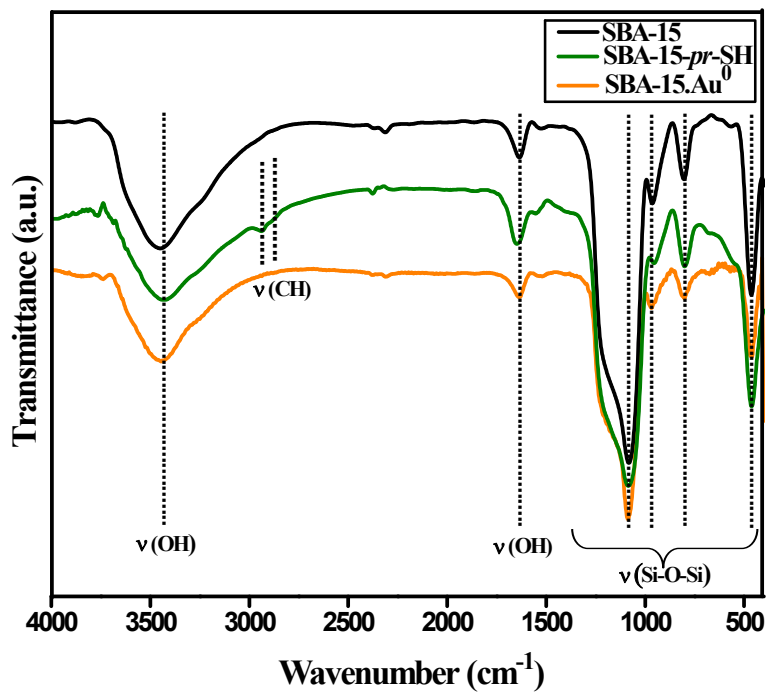

Fig. S2 FTIR spectra of all three as-prepared SBA-15 materials.

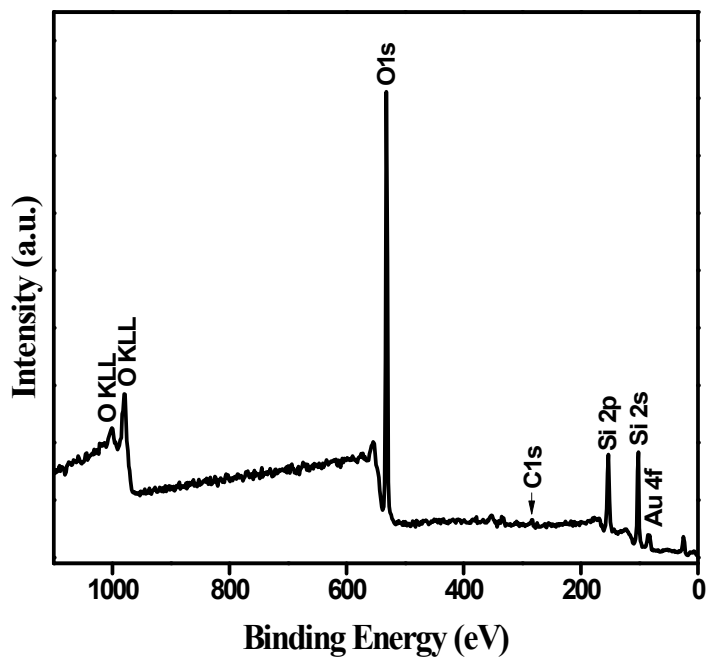

Fig. S3 Survey XPS spectra of SBA-15/Au<sup>0</sup> nanohybrid material.

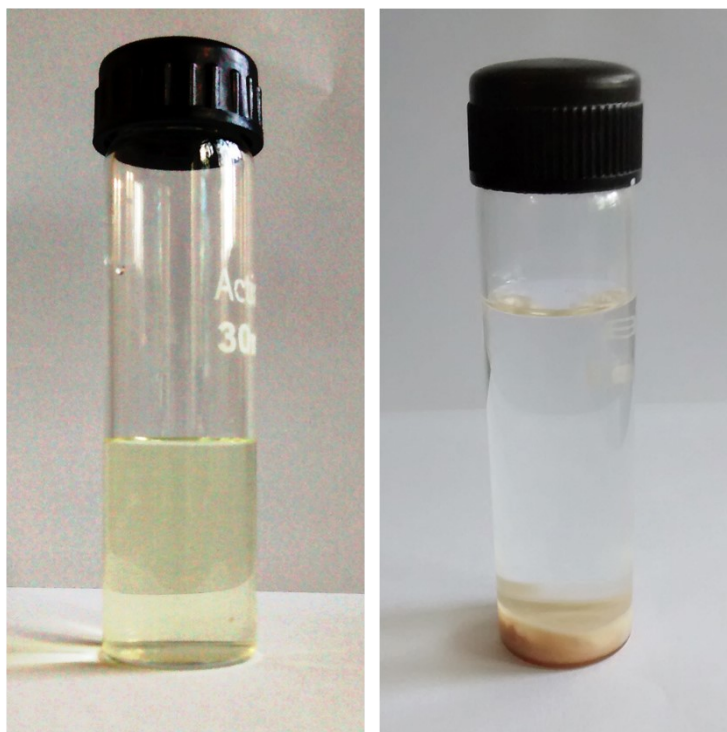

**Fig. S4** Photo of (a) aqueous  $\text{HAuCl}_4$  solution and (b) after adsorption of  $\text{AuCl}_4^-$  anions by SBA-15-*pr*-SH material.
